# Supplementary material
Source: PubMed Central journal article supplement (PMC3074625)

1

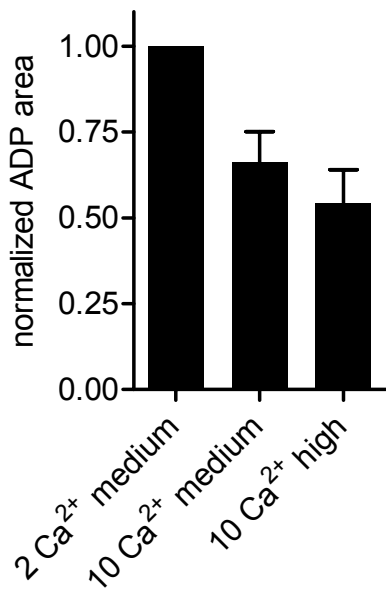

2

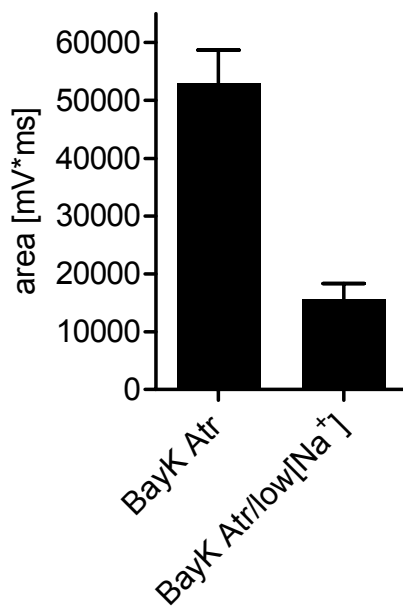

3

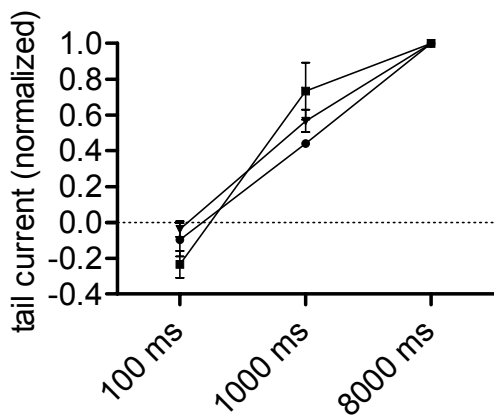

Supplement: supp_00219.2010_figS1.pdf [file supp_00219.2010_figS1.pdf]
